# Supplementary material for: Prevalence, characterization, and antibiotic susceptibility of Vibrio parahaemolyticus isolated from retail aquatic products in North China
Source: PubMed Central journal article supplement (PMC4784357; doi:10.1186/s12866-016-0650-6), 2016-03-09

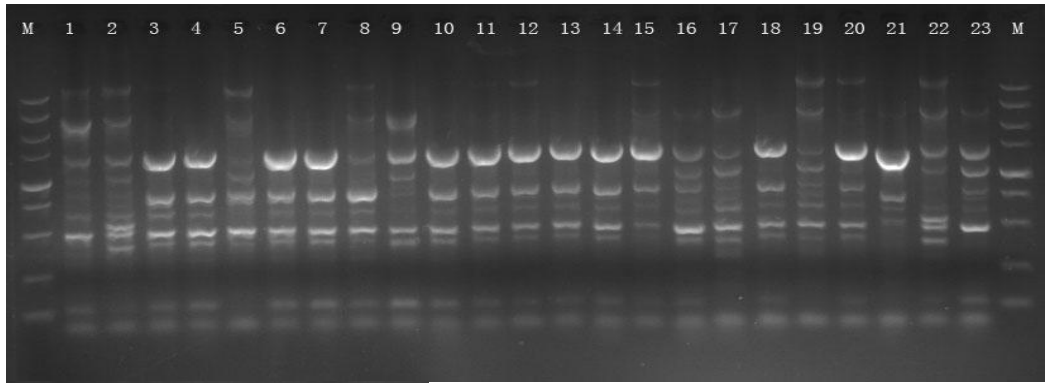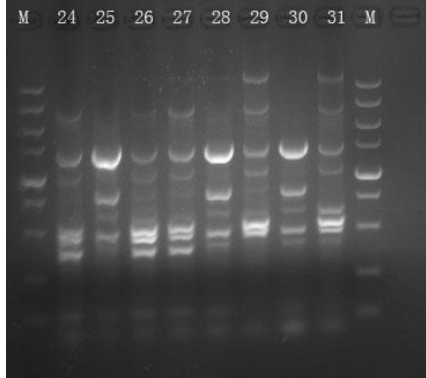

Supplement: 12866_2016_650_MOESM3_ESM.pdf [file 12866_2016_650_MOESM3_ESM.pdf]
